# Supplementary material
Source: publisher site journal article supplement (https://static.cambridge.org/content/id/urn:cambridge.org:id:article:S1041610218002259/resource/name/S1041610218002259supp001.docx)
Supplement: Supplementary file 1 [file S1041610218002259supp001.docx]

Supplementary Table 1.

Characteristics of included instruments

| Instrument | Mode of administration | Measurement Domains | No of items | Response format |  |
| --- | --- | --- | --- | --- | --- |
| DQoL | Self-report interview | Sense of Aesthetics, Feelings of Belonging, Negative Affect, Self-esteem, Positive Affect | 29 | 5-point Likert scale |  |
| QOL-AD | Self-report interview and proxy report questionnaire | Quality of life | 13 | 4-point Likert scale |  |
| QOL-AD NH | Self-report interview and proxy report questionnaire | Quality of life | 15 | 4-point Likert scale |  |
| QUALIDEM | Proxy report questionnaire | Mild to severe: Care relationship; Positive affect; Negative affect; Restless tense behaviour; Positive self-image; Social relations; Social isolation; Feeling at home; Having something to do.  Very severe: Care relationship, positive affect, negative affect, restless tense behaviour, social relation, social isolation | Mild to severe: 37  Very severe: 18 | 4-point scale |  |
| QUALID | Proxy report interview | Quality of life | 11 | 5-point Likert scale |  |
| DCM | Proxy observation | Behaviour Category Code (BCC); Well-/Ill-Being Value (WIB); Interaction; Degeneration; Personal detraction | 24 behaviour category codes | WIB recorded on 6-point LIkert scale from -5 to +5 |  |
| ADRQL | Proxy interview | Social interaction; Awareness of self; Feelings and mood; Enjoyment of activities; Response to surroundings | 47 | Dichotomous agree/disagree |  |
| ADRQL Revised | Proxy interview | Social interaction; Awareness of self; Feelings and mood; Enjoyment of activities; Response to surroundings | 40 | Dichotomous agree/disagree |  |
| QoL-D | Self and proxy report (unsure if interviewer administered) | Activity, Affect | Activity subscale: 15 Affect: 6 | Activity: 3-point scale  Affect: 5-point scale |  |
